# Supplementary material
Source: bioRxiv or medRxiv preprint supplement (https://www.biorxiv.org/highwire/filestream/76903/field_highwire_adjunct_files/0/250647-1.pdf)
Supplement: Supplementary file [file 250647-1.pdf]

## Alignment and Preprocessing

### Alignment to the reference genome with BWA

```
bwa mem \  
  -K 10000000 \  
  -M \  
  -R '${rg}' \  
  -t ${nt} \  
  hs37d5.fa ${fq1} ${fq2} | \  
sentieon util sort \  
  -o ${aligned_bam} \  
  -t ${nt} \  
  --sam2bam \  
  -i -
```

### Duplicate marking

```
sentieon driver \  
  -t ${nt} \  
  -i ${aligned_bam1} \  
  -i ${aligned_bam2} \  
  ... \  
  --algo LocusCollector \  
  score.txt
```

```
sentieon driver \  
  -t {nt} \  
  -i ${aligned_bam1} \  
  -i ${aligned_bam2} \  
  ... \  
  --algo Dedup \  
  --rmdup \  
  --score_info score.txt \  
  ${deduped_bam}
```

### Indel Realignment

```
sentieon driver \  
  -t ${nt} \  
  -r hs37d5.fa \  
  -i ${deduped_bam} \  
  --algo Realigner \  
  ${realign_sites} \  
  ${realigned_bam}
```

### Base Quality Score Recalibration

```
sentieon driver \  
  -t ${nt} \  
  -r hs37d5.fa \  
  ...
```

```
-i ${realigned_bam} \  
--algo QualCal \  
${bqsr_sites} \  
${qcal_table}
```

## Variant Calling

### TNsv

```
sentieon driver \  
-t ${nt} \  
-r hs37d5.fa \  
-i ${tumor_realigned_bam} \  
-i ${normal_realigned_bam} \  
-q ${tumor_qcal_table} \  
-q ${normal_qcal_table} \  
--algo TNsv \  
--tumor_sample ${tumor_samplename} \  
--normal_sample ${normal_samplename} \  
--call_stats_out ${out_call_stats} \  
--min_init_tumor_lod 1.0 \  
${tnsv_vcf}
```

### TNhaplotyper

```
sentieon driver \  
-t ${nt} \  
-r hs37d5.fa \  
-i ${tumor_realigned_bam} \  
-i ${normal_realigned_bam} \  
-q ${tumor_qcal_table} \  
-q ${normal_qcal_table} \  
--algo TNhaplotyper \  
--tumor_sample ${tumor_samplename} \  
--normal_sample ${normal_samplename} \  
--min_init_tumor_lod 1.0 \  
${tnhaplotyper_vcf}
```

### TNscope

```
sentieon driver \  
-t ${nt} \  
-r hs37d5.fa \  
-i ${tumor_realigned_bam} \  
-i ${normal_realigned_bam} \  
-q ${tumor_qcal_table} \  
-q ${normal_qcal_table} \  
--algo TNscope \  
--tumor_sample ${tumor_samplename} \  
--normal_sample ${normal_samplename}
```

```
--normal_sample ${normal_samplename} \  
--min_init_tumor_lod 1.0 \  
${tnscope_vcf}
```

### TNscope-model

```
sentieon driver \  
-t ${nt} \  
-r hs37d5.fa \  
-i ${tumor_realigned_bam} \  
-i ${normal_realigned_bam} \  
-q ${tumor_qcal_table} \  
-q ${normal_qcal_table} \  
--algo TNscope \  
--tumor_sample ${tumor_samplename} \  
--normal_sample ${normal_samplename} \  
--no_mapq_cap 1 \  
--clip_by_minbq 1 \  
--assemble_mode 4 \  
--max_error_per_read 3 \  
--min_init_tumor_lod 1.0 \  
--min_normal_lod 1.0 \  
--min_tumor_allele_frac 0.006 \  
${tnscope_raw_vcf}
```

# apply the machine learning model

```
sentieon driver \  
-r hs37d5.fa \  
--algo TNModelApply \  
-v ${tnscope_raw_vcf} \  
-m Sentieon_GiAB_201711.model \  
${tnscope_model_vcf}
```

# remove default hard filters

```
bcftools annotate \  
-o ${tnscope_filter_vcf} \  
-O z \  
-x "^FILTER/MLrejected,FILTER/PASS" \  
${tnscope_model_vcf}
```

### Truthset Generation

Merge the two high-confidence regions

```
bedtools intersect \  
-a <(sort -k1,3V $tumor_bed) \  
-b <(sort -k1,3V $normal_bed) \  
| sort -k1,3V \  
| bedtools merge -i - \  
|
```

```
| sort -k1,3V \  
> $merged_bed
```

Generate the unique truthset for the tumor sample

```
bcftools isec \  
-C \  
-o ${unique_truth} \  
-O z \  
-w 1 \  
-R $merged_bed \  
$tumor_truth \  
$normal_truth \  
sentieon util vcfindex $unique_truth
```

Call the unique variants to the tumor sample in the normal sample

```
sentieon driver \  
-i $normal_bam \  
-q $normal_recal_table \  
-t ${nt} \  
-r $ref \  
--interval $autosomes \  
--algo TNscope \  
--tumor_sample $normal_sample \  
--given $unique_truth \  
$given_vcf
```

Filter the given VCF

```
bcftools view \  
-O z \  
-i 'FORMAT/AD[1] >= 10 | (FORMAT/AD[1] / (FORMAT/AD[0] +  
FORMAT/AD[1])) > 0.1' \  
$given_vcf \  
> $mask_vcf
```

Mask variants present in the normal sample

```
bedtools subtract \  
-a $merged_bed \  
-b $mask_vcf \  
> $mask_bed
```

## Variant Evaluation

Generating SNV and indel callsets

```
# SNPs VCF  
bcftools view \  
-o ${snps_vcf} \  
> $snps_vcf
```

```
-O z \  
-v snps \  
  ${raw_vcf}  
sentieon util vcfindex ${snps_vcf}
```

```
# indels VCF  
bcftools view \  
  -o ${indels_vcf} \  
  -O z \  
  -V snps \  
  ${raw_vcf}  
sentieon util vcfindex ${indels_vcf}
```

### TNsnv, TNhaplotyper, and TNscope

```
java -jar RTG.jar vcfeval \  
  --baseline=${truth_vcf} \  
  --calls=${calls_vcf} \  
  --template=${ref} \  
  --bed-regions=${truth_bed} \  
  --output=${output} \  
  --squash-ploidy \  
  --sample=${sample_name} \  
  --vcf-score-field=INFO.TLOD
```

### Plotting - TNscope-model

```
java -jar RTG.jar vcfeval \  
  --baseline=${truth_vcf} \  
  --calls=${calls_vcf} \  
  --template=${ref} \  
  --bed-regions=${truth_bed} \  
  --output=${output} \  
  --squash-ploidy \  
  --sample=${sample_name} \  
  --vcf-score-field=INFO.ROC_VAL \  
  --all-records
```

### Scoring - TNscope-model

```
java -jar RTG.jar vcfeval \  
  --baseline=${truth_vcf} \  
  --calls=${calls_vcf} \  
  --template=${ref} \  
  --bed-regions=${truth_bed} \  
  --output=${output} \  
  --squash-ploidy \  
  --sample=${sample_name} \  
  --vcf-score-field=INFO.ROC_VAL
```
